# Supplementary material for: Structural and optical properties of Vernier phase lutetium oxyfluorides doped with lanthanide ions: interesting candidates as scintillators and X-ray phosphors
Source: Royal Society of Chemistry journal article supplement (doi:10.1039/c2jm31317k), 2012-01-01
Supplement: c2jm31317k.pdf [file c2jm31317k.pdf]

*Supporting info*

Structural and optical properties of Vernier phase  
lutetium oxyfluorides doped with lanthanide ions:  
interesting candidates for scintillator and X-Ray  
phosphors

*T. Passuello<sup>1</sup>, F. Piccinelli<sup>1</sup>, M. Trevisani<sup>1</sup>, M. Giarola<sup>2</sup>, G. Mariotto<sup>2</sup>, L. Marciniak<sup>3</sup>, D. Hreniak<sup>3</sup>, M. Guzik<sup>4</sup>, M. Fasoli<sup>5</sup>, A. Vedda<sup>5</sup>, V. Jary<sup>6</sup>, M. Nikl<sup>6</sup>, V. Causin<sup>7</sup>, M. Bettinelli<sup>1</sup>, A. Speghini<sup>1</sup>*

<sup>1</sup>Dipartimento di Biotecnologie, Università di Verona and INSTM, UdR Verona, Strada Le Grazie 15, I-37134 Verona, Italy

<sup>2</sup>Dipartimento di Informatica, Università di Verona, Strada Le Grazie 15, I-37134 Verona, Italy

<sup>3</sup>Institute of Low Temperature and Structure Research, PAS, ul.Okolna 2, PL-50-422 Wrocław, Poland

<sup>4</sup>Faculty of Chemistry, University of Wrocław, Joliot-Curie 14, PL-50-383 Wrocław, Poland

<sup>5</sup>Dipartimento di Scienza dei Materiali, Università di Milano-Bicocca, Via Cozzi 53, 20125 – Milano, Italy

<sup>6</sup>Institute of Physics AS CR v. v. i., Cukrovarnicka 10, 16253, Prague, Czech Republic

<sup>7</sup> Dipartimento di Scienze Chimiche, Università di Padova, via Marzolo 1, I-35131 Padova, Italy

**Table ST1.** Infrared (IR) and Raman energies for the lutetium oxyfluoride.

| <b>IR (cm<sup>-1</sup>)</b> | <b>Raman (cm<sup>-1</sup>)</b> |
|-----------------------------|--------------------------------|
|                             | 66                             |
| 77                          |                                |
| 93                          |                                |
|                             | ~120 (sh)                      |
| 122                         |                                |
|                             | 130                            |
|                             | 140                            |
| 146                         |                                |
| 157                         |                                |
|                             | ~175 (w, sh)                   |
| 180                         |                                |
|                             | ~200 (sh)                      |
|                             | 204                            |
|                             | 215 (broad)                    |
| 218                         |                                |
|                             | 225                            |
|                             | 260                            |
| 264                         |                                |
| 287                         |                                |
|                             | 292 (w)                        |
|                             | ~324 (sh)                      |
|                             | ~340 (sh)                      |
|                             | 365                            |

|     |     |
|-----|-----|
| 407 |     |
|     | 439 |
| 457 |     |
|     | 524 |
| 544 |     |
|     | 568 |
|     | 639 |
| 642 |     |
|     | 656 |

**Table ST2.** Effective decay times for the Pr<sup>3+</sup> doped lutetium oxyfluoride sample measured at different temperatures ( $\lambda_{\text{exc}}=470$  nm,  $\lambda_{\text{em}}=653$  nm)

| <b>T (K)</b> | <b><math>\tau_{\text{eff}}</math> (<math>\mu\text{s}</math>)</b> |
|--------------|------------------------------------------------------------------|
| 10           | 16.8 $\pm$ 0.3                                                   |
| 50           | 17.4 $\pm$ 0.3                                                   |
| 100          | 16.7 $\pm$ 0.3                                                   |
| 150          | 16.8 $\pm$ 0.3                                                   |
| 200          | 17.1 $\pm$ 0.3                                                   |
| 250          | 16.9 $\pm$ 0.3                                                   |
| 300          | 17.3 $\pm$ 0.3                                                   |

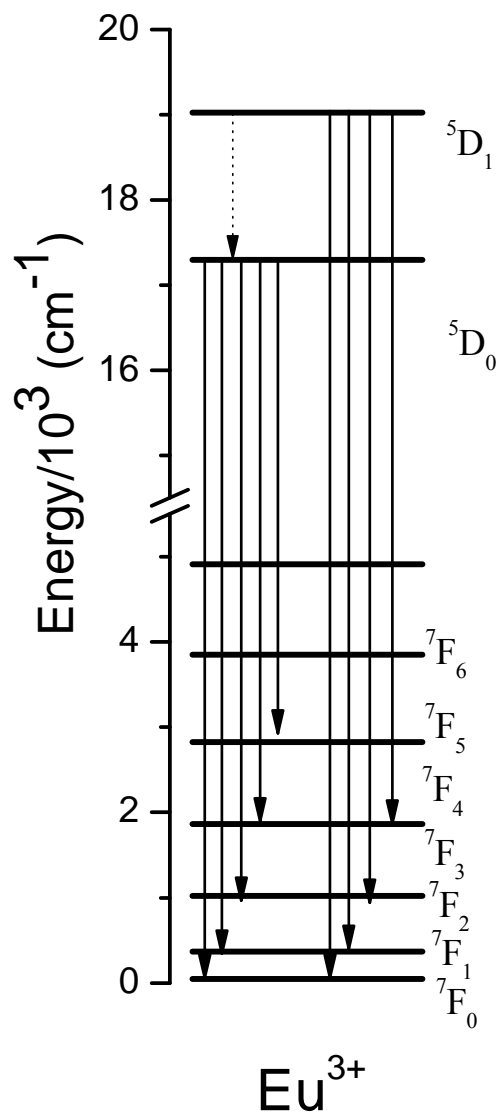

**Figure SF1.** Energy levels, radiative (solid lines) and non-radiative (dotted line) transitions for the  $\text{Eu}^{3+}$  ion.

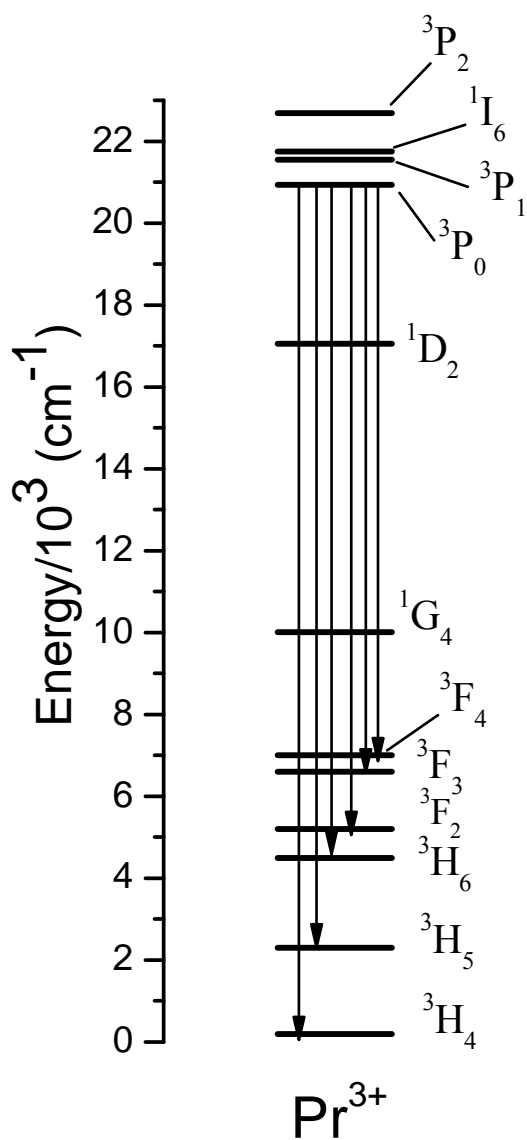

**Figure SF2.** Energy levels and radiative transitions for  $\text{Pr}^{3+}$ .

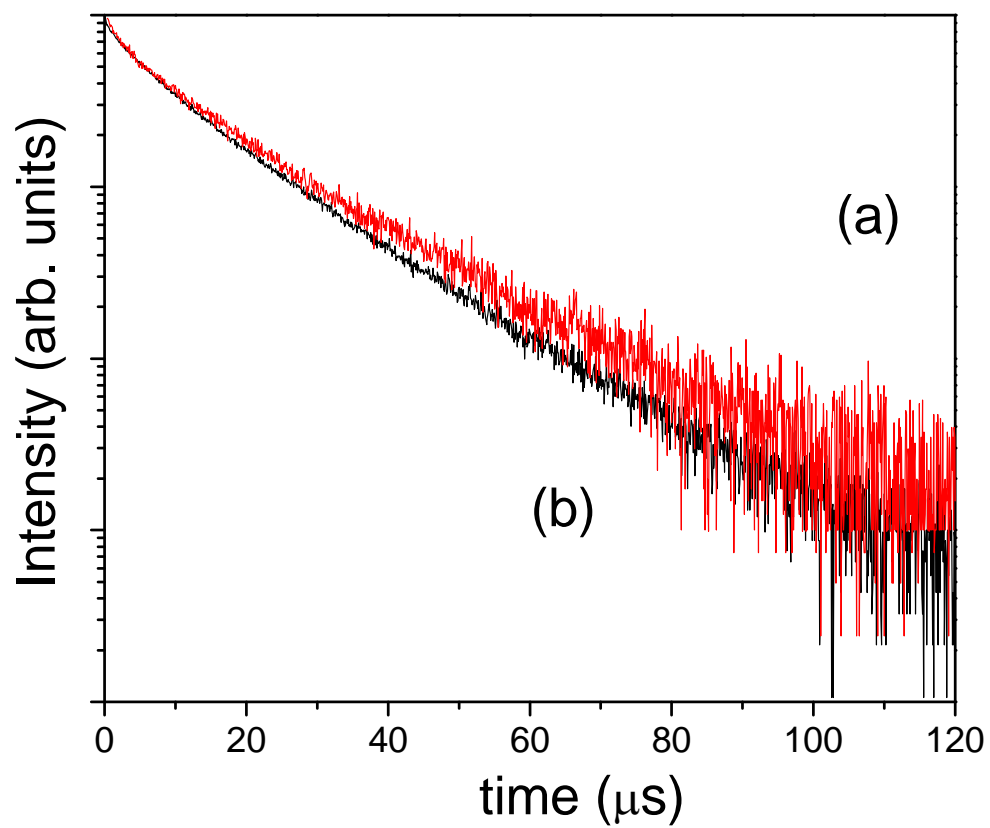

**Figure SF3.** Emission decay curves ( $\lambda_{\text{exc}}=470$  nm,  $\lambda_{\text{em}}=650$  nm) for  $\text{Pr}^{3+}$  doped lutetium oxyfluoride at 10 K (a, red line) and RT (b, black line).
